# Supplementary material for: Deep Learning for the Pathologic Diagnosis of Hepatocellular Carcinoma, Cholangiocarcinoma, and Metastatic Colorectal Cancer
Source: MDPI journal article supplement (doi:10.3390/cancers15225389), 2023-11-13
Supplement: s1 [file s1]

**Supplementary Table S1.** Baseline characteristics of all cohorts

| <b>TCGA-LIHC (N = 366)</b> | <b>Frequency (%)</b> |
|----------------------------|----------------------|
| Age (years)                |                      |
| Median                     | 50.5 (16–85)         |
| Sex                        |                      |
| M                          | 248 (67.8)           |
| F                          | 118 (32.2)           |
| Race                       |                      |
| White                      | 185 (50.5)           |
| Black                      | 16 (4.4)             |
| Asian                      | 160 (43.7)           |
| Other                      | 2 (0.5)              |
| Family History of Cancer   |                      |
| No                         | 211 (57.7)           |
| Yes                        | 105 (28.7)           |
| pT stage                   |                      |
| 1                          | 182 (49.7)           |
| 2                          | 91 (24.9)            |
| 3                          | 79 (21.6)            |
| 4                          | 12 (3.3)             |
| pN stage                   |                      |
| 0                          | 255 (69.7)           |
| 1                          | 4 (1.1)              |
| Vascular Invasion          |                      |
| Absent                     | 207 (56.6)           |
| Present (Microvascular)    | 93 (25.4)            |
| Present (Macrovascular)    | 16 (4.4)             |
| Surgical Procedure         |                      |
| Segmentectomy              | 175 (47.8)           |
| Lobectomy                  | 161 (44.0)           |
| Total Hepatectomy          | 1 (0.3)              |
| Other                      | 26 (7.1)             |
| <b>TCGA-CHOL (N = 39)</b>  | <b>Frequency (%)</b> |
| Age (years)                |                      |
| Median                     | 55.5 (29–82)         |
| Sex                        |                      |
| M                          | 16 (41.0)            |
| F                          | 23 (59.0)            |
| Race                       |                      |
| White                      | 35 (89.7)            |
| Black                      | 3 (7.7)              |
| Asian                      | 1 (2.6)              |
| Family History of Cancer   |                      |
| No                         | 16 (41.0)            |
| Yes                        | 22 (56.4)            |
| pT stage                   |                      |
| 1                          | 20 (51.3)            |
| 2                          | 11 (28.2)            |
| 3                          | 7 (17.9)             |
| 4                          | 1 (2.6)              |
| pN stage                   |                      |
| 0                          | 30 (76.9)            |
| 1                          | 5 (12.8)             |
| Vascular Invasion          |                      |
| Absent                     | 34 (87.2)            |
| Present (Microvascular)    | 5 (12.8)             |

|                            |                      |
|----------------------------|----------------------|
| Surgical Procedure         |                      |
| Segmentectomy              | 16 (41.0)            |
| Lobectomy                  | 16 (41.0)            |
| Pancreaticoduodenectomy    | 3 (7.7)              |
| Other                      | 4 (10.3)             |
| <b>DKUH-CHOL (N = 156)</b> | <b>Frequency (%)</b> |
| Age (years)                |                      |
| Median                     | 62 (38–86)           |
| Sex                        |                      |
| M                          | 98 (62.8)            |
| F                          | 58 (37.2)            |
| Size (cm)                  |                      |
| Mean                       | 4.82 (1.1–19.0)      |
| pT stage                   |                      |
| 1                          | 40 (25.6)            |
| 2                          | 73 (46.8)            |
| 3                          | 23 (14.7)            |
| 4                          | 16 (10.3)            |
| pN stage                   |                      |
| 0                          | 51 (32.7)            |
| 1                          | 50 (32.0)            |
| Differentiation            |                      |
| Well                       | 26 (16.7)            |
| Moderate                   | 105 (67.3)           |
| Poor                       | 15 (9.6)             |
| <b>DKUH-META (N = 179)</b> | <b>Frequency (%)</b> |
| Age (years)                |                      |
| Median                     | 59.5 (32–87)         |
| Sex                        |                      |
| M                          | 116 (64.8)           |
| F                          | 63 (35.2)            |
| Size (cm)                  |                      |
| Mean                       | 2.84 (0.2–13.0)      |
| <b>SSMH-HCC (N = 31)</b>   | <b>Frequency (%)</b> |
| Age (years)                |                      |
| Median                     | 63 (41–85)           |
| Sex                        |                      |
| M                          | 23 (74.2)            |
| F                          | 8 (25.8)             |
| Size (cm)                  |                      |
| Mean                       | 3.34 (1.2–12.0)      |
| pT stage                   |                      |
| 1                          | 17 (54.8)            |
| 2                          | 7 (22.6)             |
| 3                          | 1 (3.2)              |
| 4                          | 4 (12.9)             |
| Vascular Invasion          |                      |
| Absent                     | 21 (67.7)            |
| Present                    | 10 (32.3)            |
| Edmondson-Steiner grade    |                      |
| I                          | 1 (3.2)              |
| II                         | 11 (35.5)            |
| III                        | 13 (41.9)            |
| IV                         | 5 (16.1)             |
| <b>SSMH-CC (N = 29)</b>    | <b>Frequency (%)</b> |
| Age (years)                |                      |
| Median                     | 70.5 (45–85)         |

|                 |               |
|-----------------|---------------|
| Sex             |               |
| M               | 17 (58.6)     |
| F               | 12 (41.4)     |
| Size (cm)       |               |
| Mean            | 3.7 (1.8–9.2) |
| pT stage        |               |
| 1               | 10 (34.5)     |
| 2               | 14 (48.3)     |
| 3               | 3 (10.3)      |
| 4               | 1 (3.4)       |
| pN stage        |               |
| 0               | 11 (37.9)     |
| 1               | 11 (37.9)     |
| Differentiation |               |
| Well            | 5 (17.2)      |
| Moderate        | 21 (72.4)     |
| Poor            | 2 (6.9)       |

DKUH: Dankook University Hospital, SSMH: Seoul St. Mary's Hospital, TCGA: The Cancer Genome Atlas, HCC: Hepatocellular carcinoma, CC: Cholangiocarcinoma, META: metastatic colorectal cancer

**Supplementary Table S2.** Performance of AlexNet, ResNet-50, and Inception-v3 models for the normal/tumor classification represented as area under the curves for the receiver operating characteristic curves.

|              | hepatocellular carcinoma | cholangiocarcinoma | metastatic cancer |
|--------------|--------------------------|--------------------|-------------------|
| AlexNet      | 0.984                    | 0.982              | 0.985             |
| ResNet-50    | 0.989                    | 0.986              | 0.989             |
| Inception-v3 | 0.989                    | 0.988              | 0.991             |

**Supplementary Table S3.** The average number of patches in each training fold for the 5-fold cross validation scheme. The average training epoch was also presented.

|                                                                                      | Average number of hepatocellular carcinoma tissue patches for training | Average number of other cancer types tissue patches for training | Average training epoch |
|--------------------------------------------------------------------------------------|------------------------------------------------------------------------|------------------------------------------------------------------|------------------------|
| hepatocellular carcinoma/other cancer types classification (TCGA+DKUH datasets)      | 1,148,109                                                              | 1,039,534                                                        | 19                     |
|                                                                                      | Average number of cholangiocarcinoma tissue patches for training       | Average number of metastatic cancer tissue patches for training  | Average training epoch |
| cholangiocarcinoma / metastatic cancer classification (TCGA+DKUH datasets)           | 485,607                                                                | 553,927                                                          | 21                     |
|                                                                                      | Average number of hepatocellular carcinoma tissue patches for training | Average number of other cancer types tissue patches for training | Average training epoch |
| hepatocellular carcinoma/other cancer types classification (TCGA+DKUH+SSMH datasets) | 1,527,854                                                              | 1,472,698                                                        | 17                     |

DKUH: Dankook University Hospital, SSMH: Seoul St. Mary's Hospital, TCGA: The Cancer Genome Atlas

**Supplementary Table S4.** Accuracy, sensitivity, specificity, and F1 score of the classification results. The measures were obtained with cutoff values yielding maximal Youden index (sensitivity + specificity - 1).

|                                                                                                                                                               | Accuracy | Sensitivity | Specificity | F1 score |
|---------------------------------------------------------------------------------------------------------------------------------------------------------------|----------|-------------|-------------|----------|
| hepatocellular carcinoma/other cancer types classification (TCGA+DKUH datasets by a classifier trained with TCGA+DKUH datasets: Figure 3)                     | 0.983    | 0.979       | 0.989       | 0.985    |
| cholangiocarcinoma / metastatic cancer classification (TCGA+DKUH datasets by a classifier trained with TCGA+DKUH datasets: Figure 4)                          | 0.946    | 0.925       | 0.990       | 0.959    |
| hepatocellular carcinoma/other cancer types classification (SSMH datasets by a classifier trained with TCGA+DKUH datasets: Supplementary Figure S1)           | 0.745    | 0.417       | 1.000       | 0.588    |
| hepatocellular carcinoma/other cancer types classification (SSMH datasets by a classifier trained with TCGA+DKUH +SSMH datasets: Figure 5)                    | 1.000    | 1.000       | 1.000       | 1.000    |
| hepatocellular carcinoma/other cancer types classification (TCGA+DKUH datasets by a classifier trained with TCGA+DKUH+SSMH datasets: Supplementary Figure S2) | 0.985    | 0.977       | 0.994       | 0.986    |

DKUH: Dankook University Hospital, SSMH: Seoul St. Mary's Hospital, TCGA: The Cancer Genome Atlas
